# Supplementary material for: Cas9 targeted nanopore sequencing with enhanced variant calling improves CYP2D6-CYP2D7 hybrid allele genotyping
Source: PubMed Central journal article supplement (PMC9534437; doi:10.1371/journal.pgen.1010176), 2022-09-23
Supplement: pgen.1010176.s001.pdf [file pgen.1010176.s001.pdf]

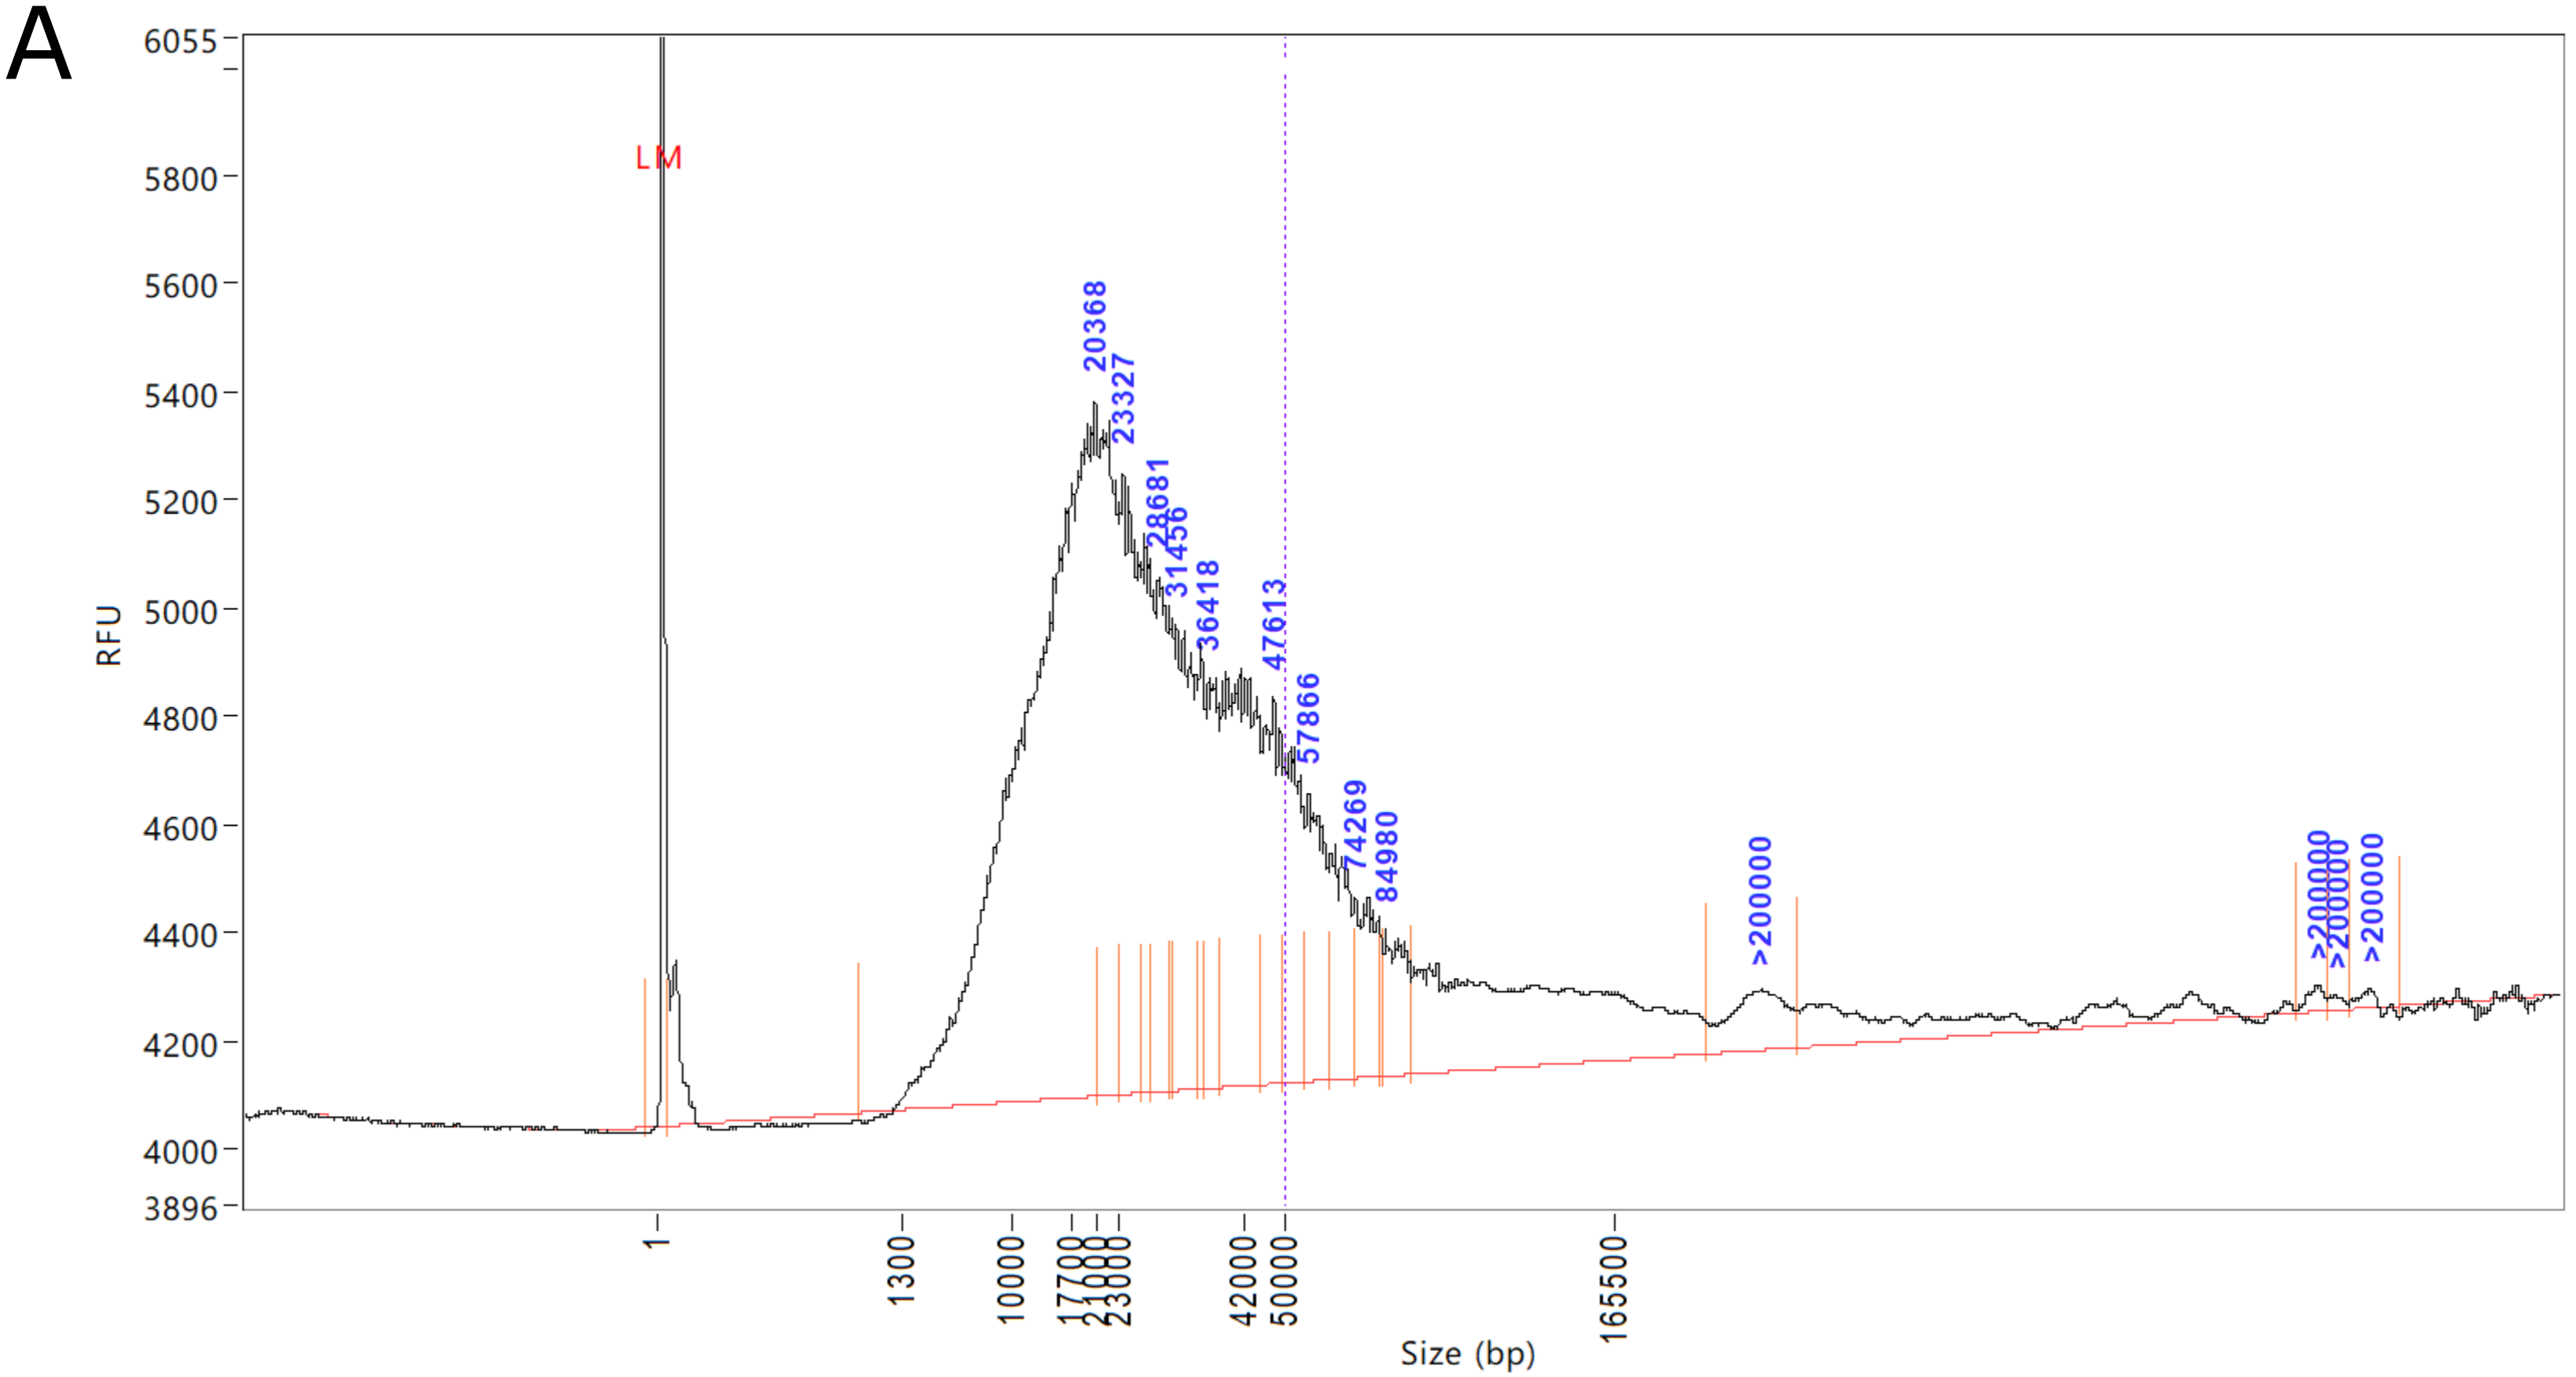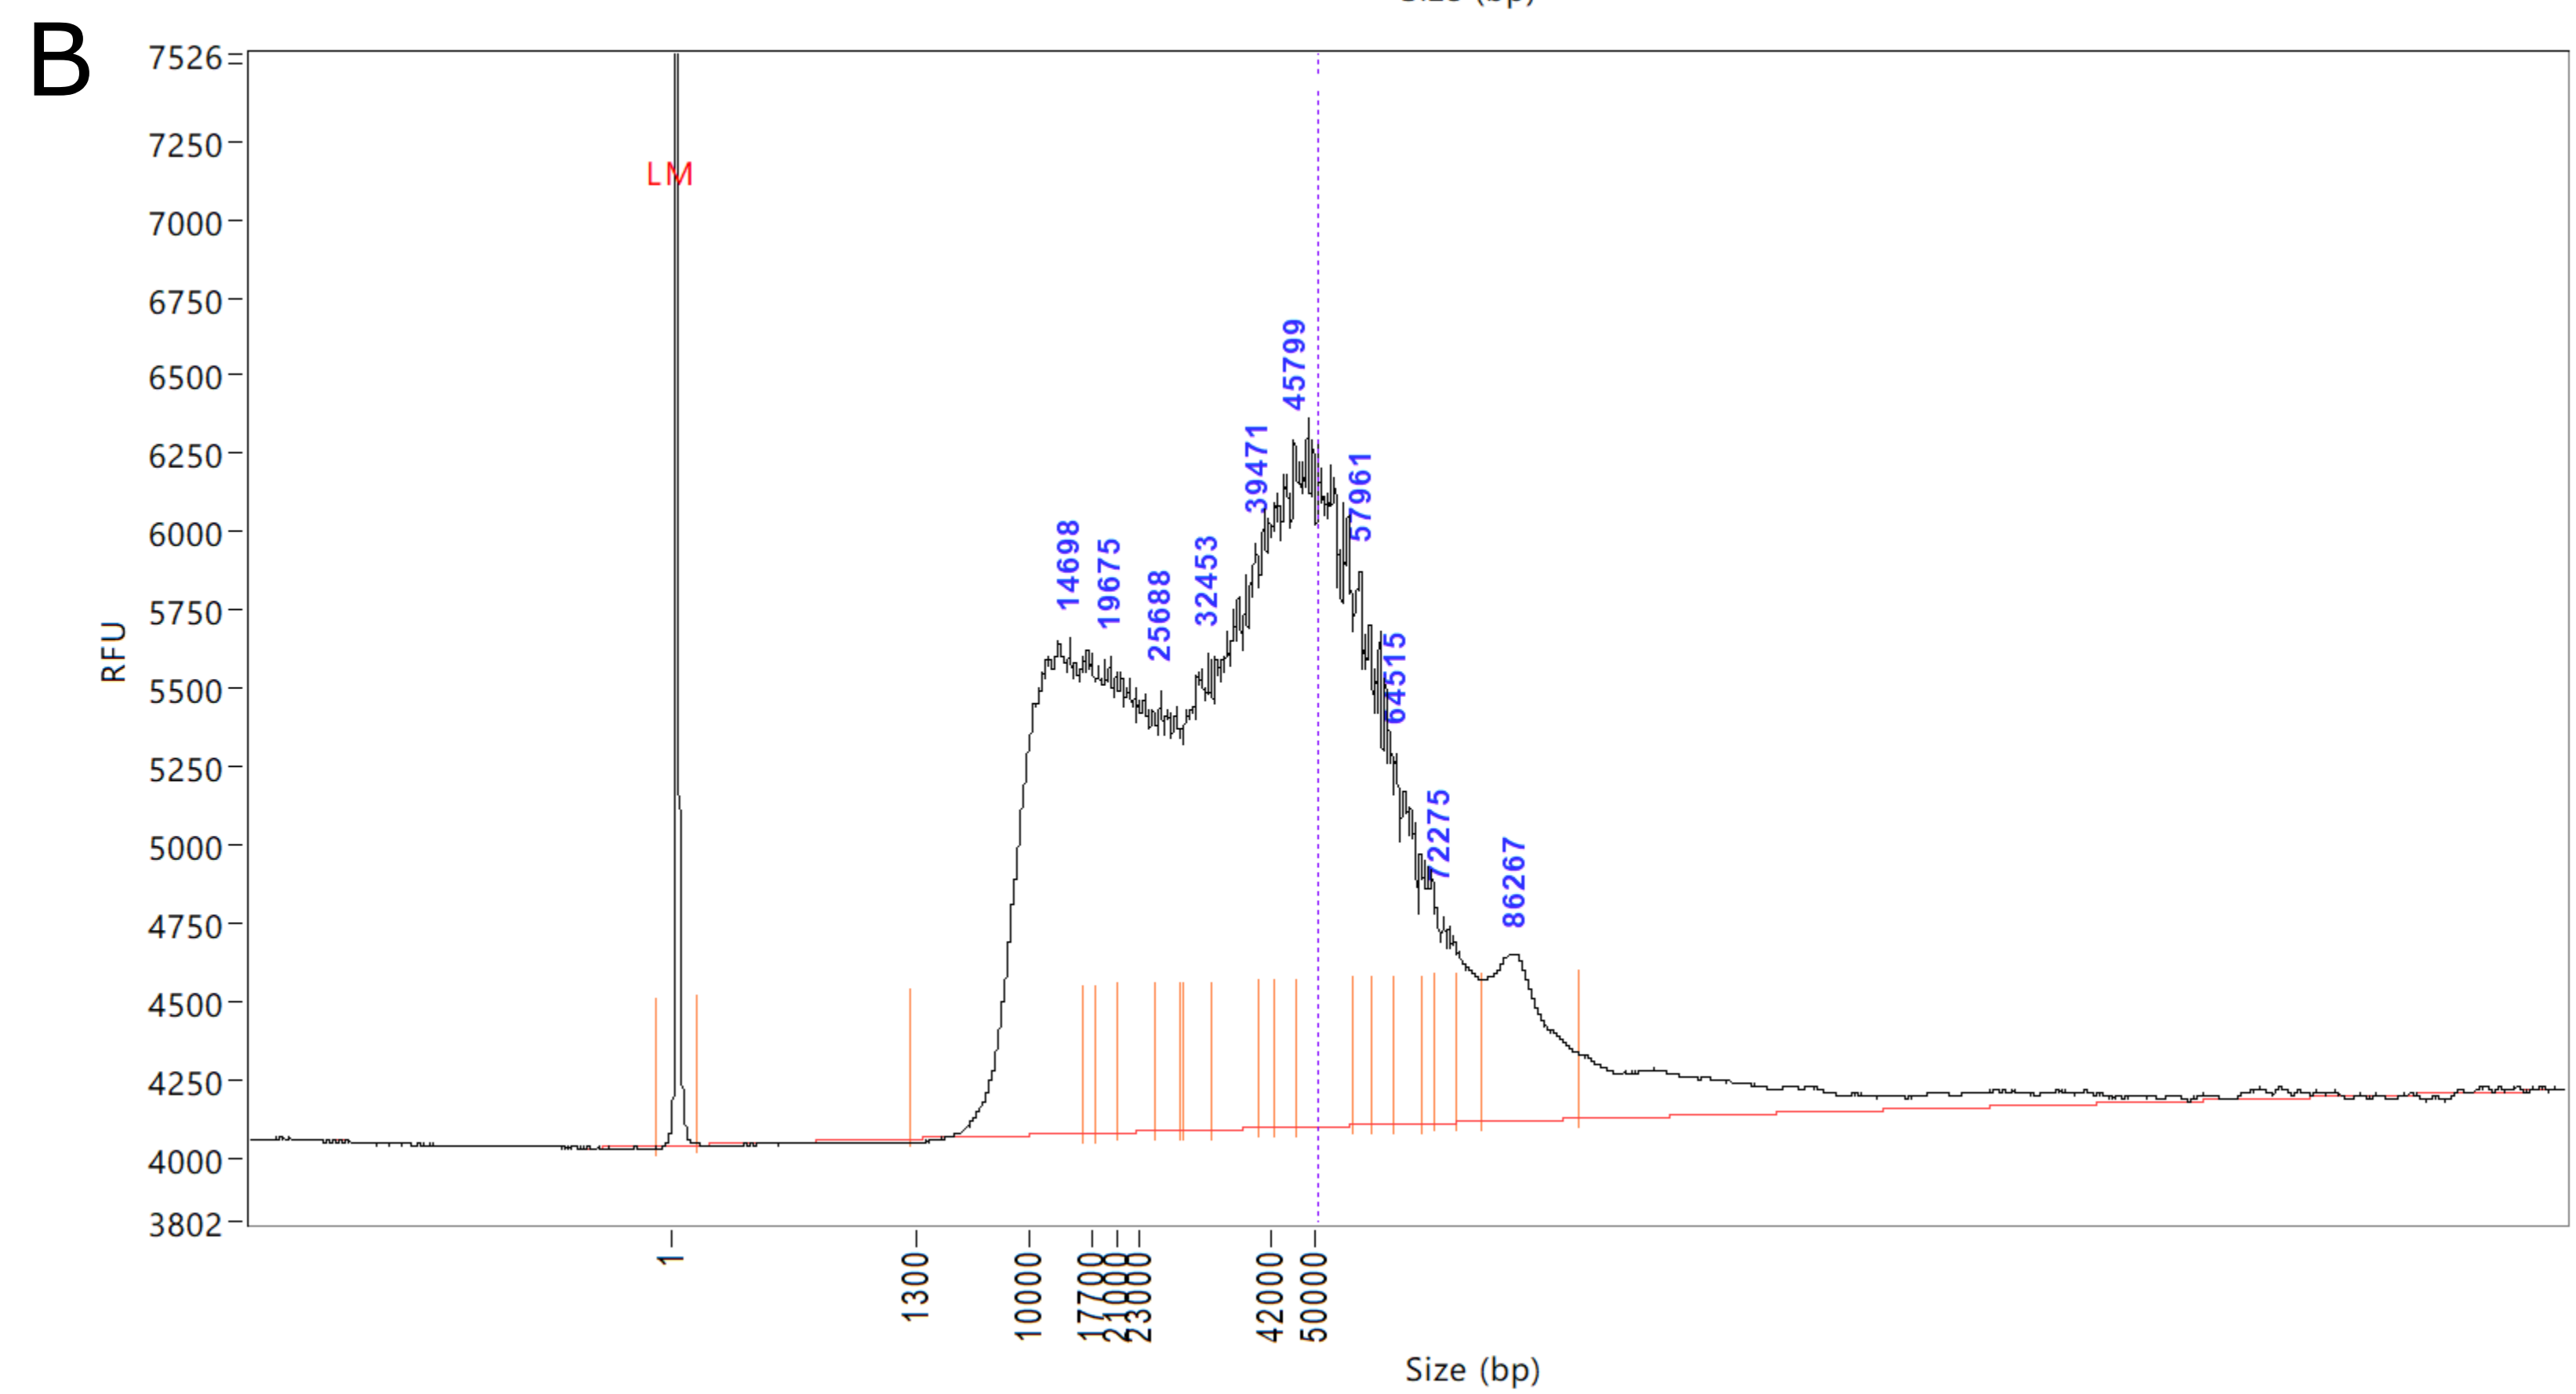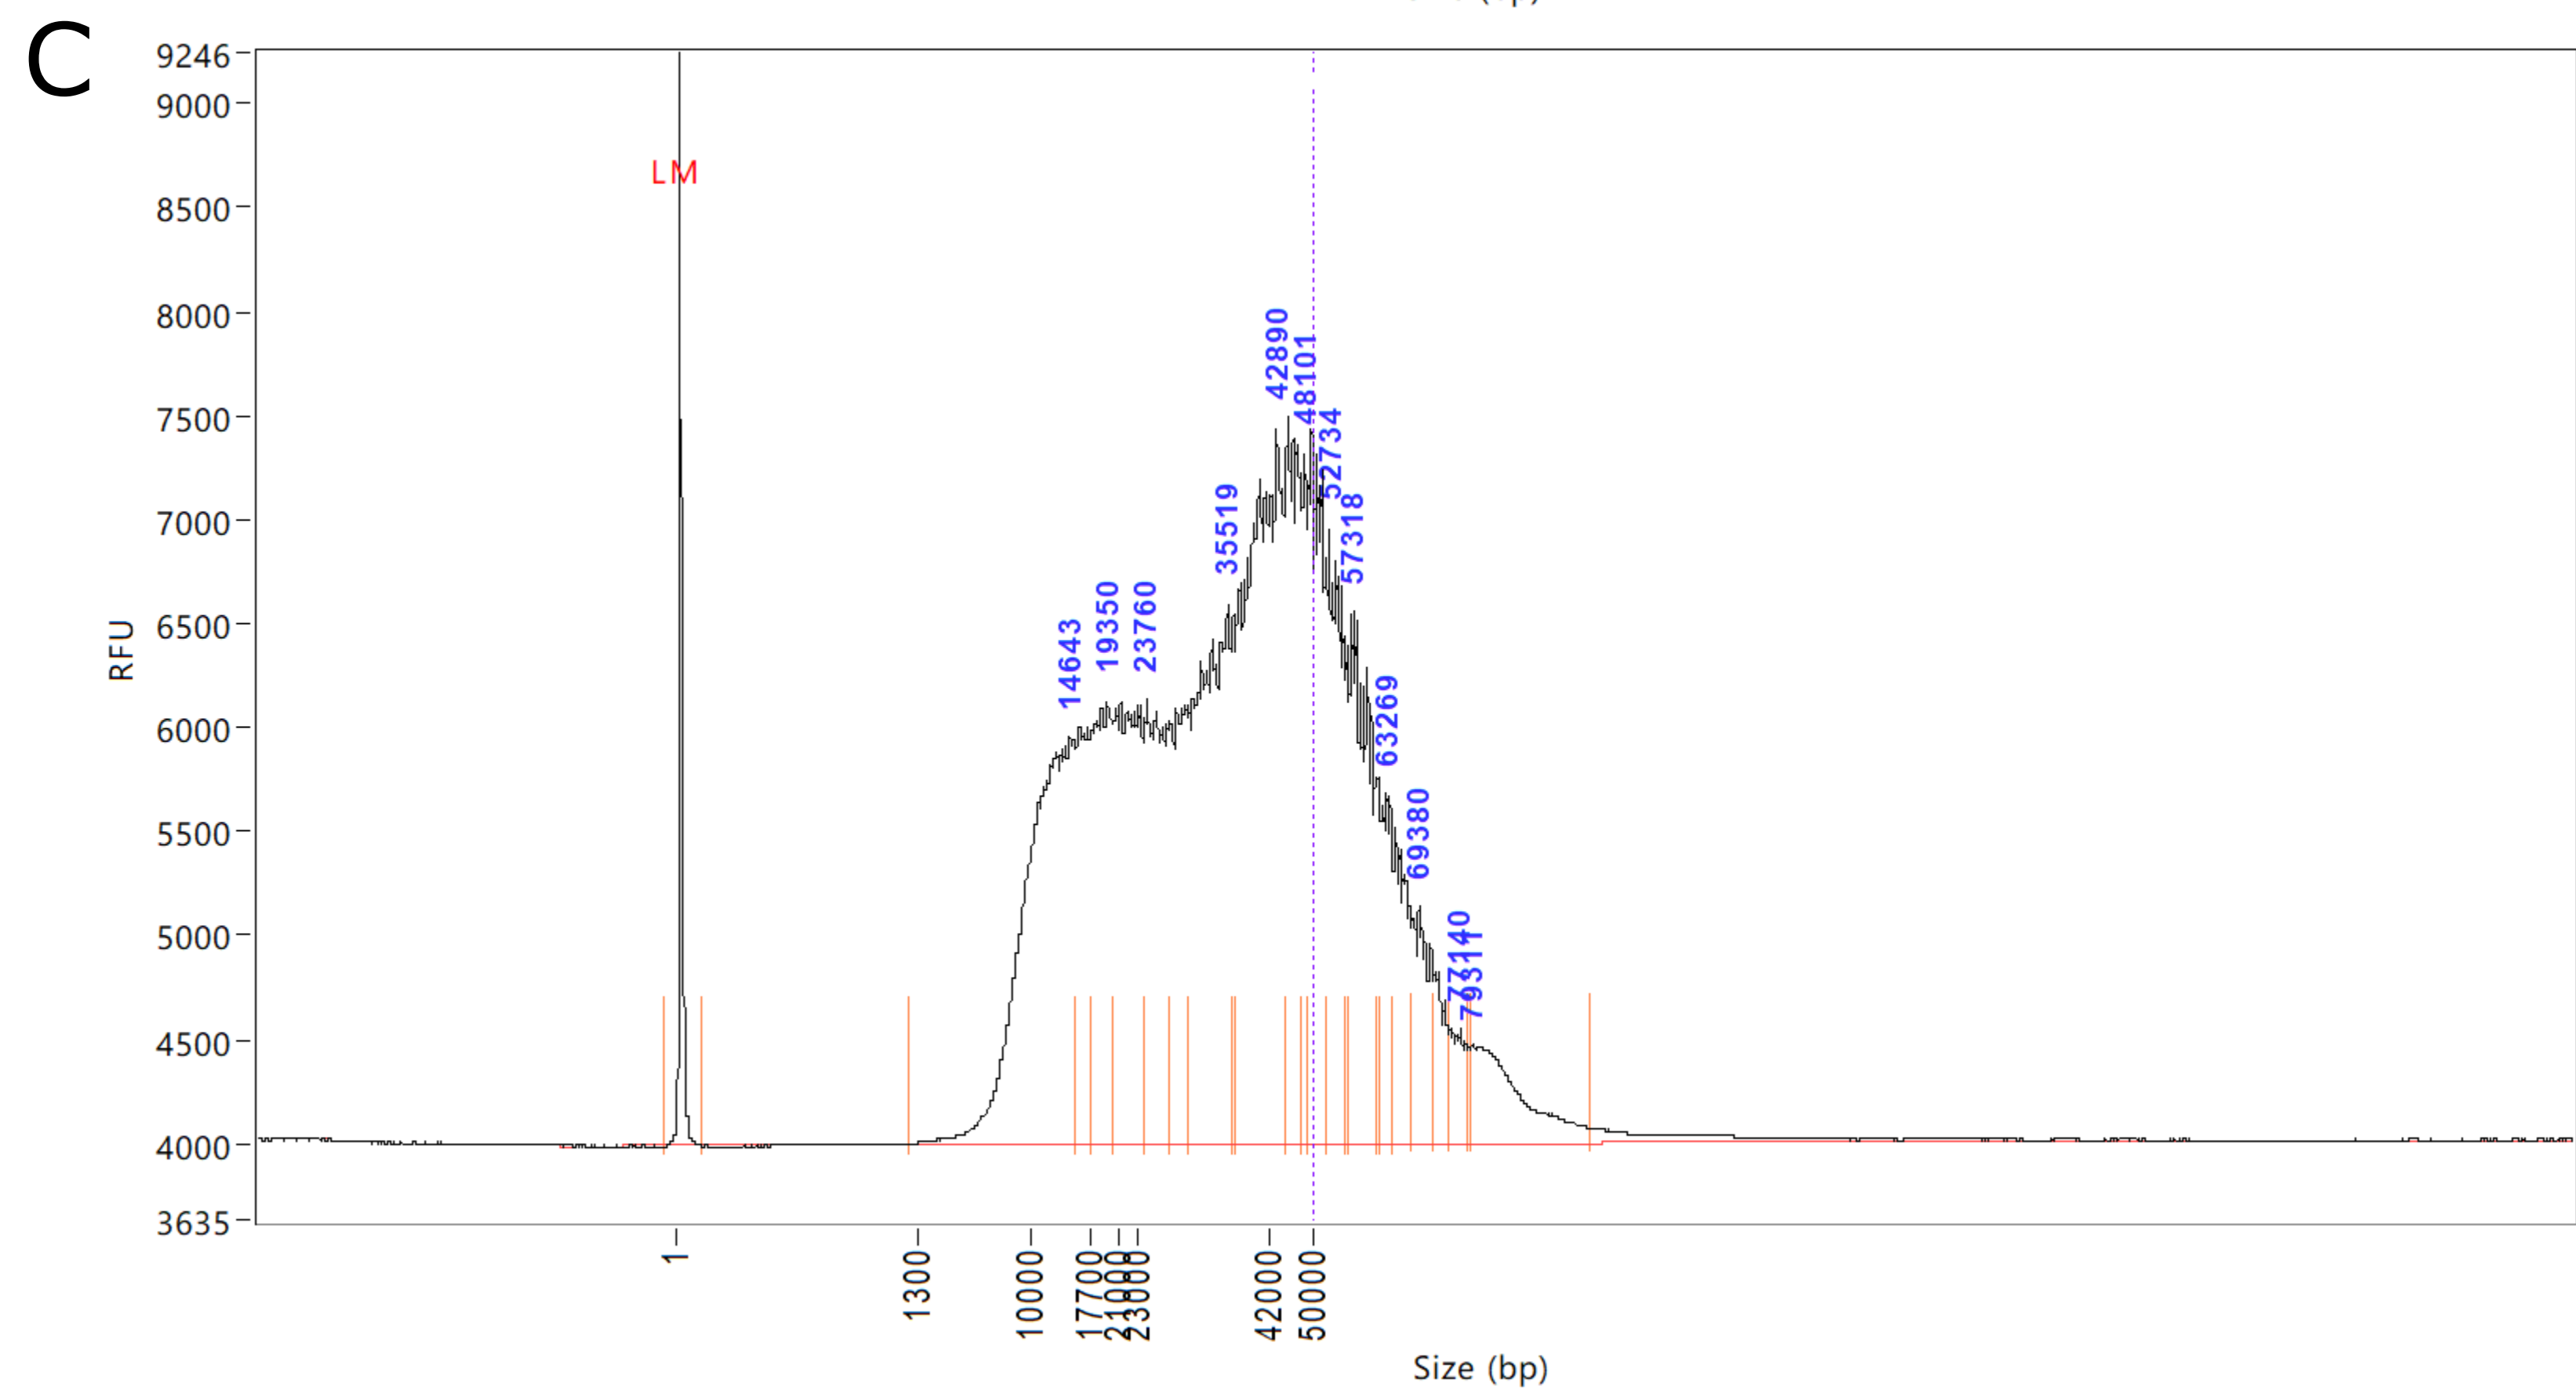

**S1 Fig** Femto pulse profiles of the used DNA samples. The x-axis represents the DNA fragment size (non-linear scale). The y-axis represents the fluorescent signal proportional to the amount of DNA. A: NA12878, B: HG01190, and C: GM19785.
