# Supplementary material for: Cas9 targeted nanopore sequencing with enhanced variant calling improves CYP2D6-CYP2D7 hybrid allele genotyping
Source: PubMed Central journal article supplement (PMC9534437; doi:10.1371/journal.pgen.1010176), 2022-09-23
Supplement: pgen.1010176.s006.pdf [file pgen.1010176.s006.pdf]

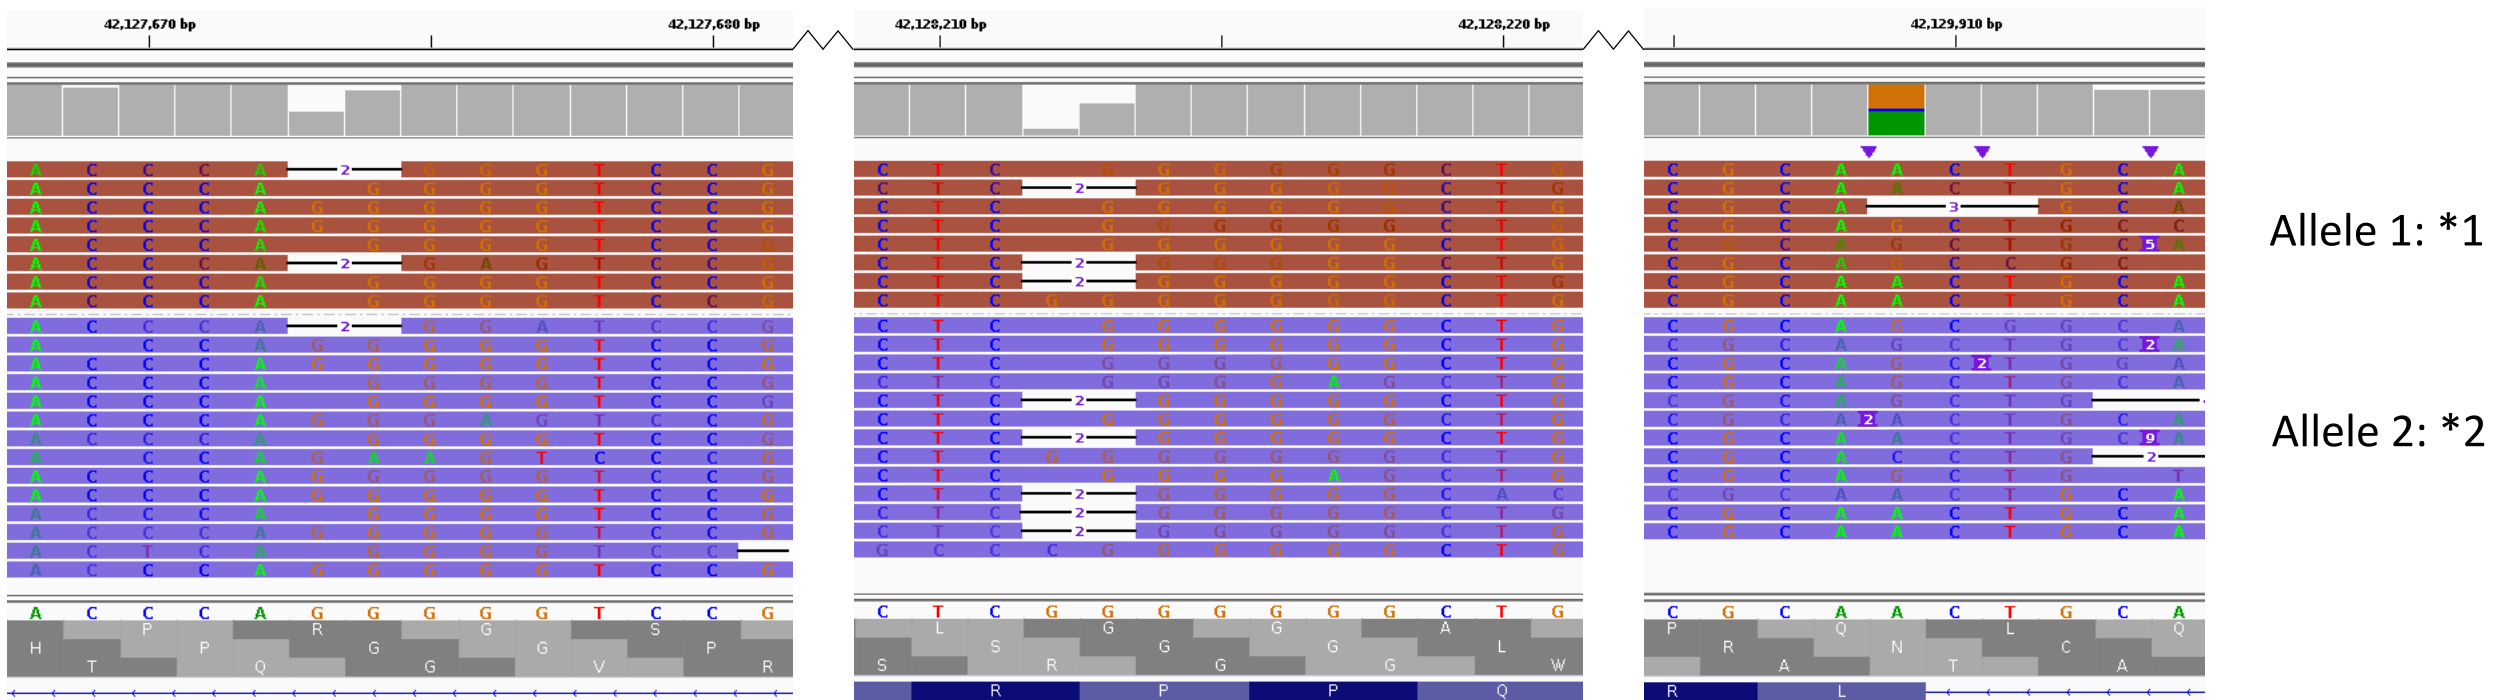

S6 Fig CoLoRGen detected four additional small variants in the GM19785 cell line that are not present in the sub-allele definitions. The three deletions were located in homopolymeric regions and the SNV is a silent mutation.
